# Supplementary material for: Enhanced moisture and thermal stability of transparent electrodes via crosslinking for large-area flexible organic photovoltaic modules
Source: Royal Society of Chemistry journal article supplement (doi:10.1039/d4ee05154h), 2025-01-01
Supplement: d4ee05154h1.pdf [file d4ee05154h1.pdf]

## **Contents:**

Figures S1-8

Tables S1-3

Reference

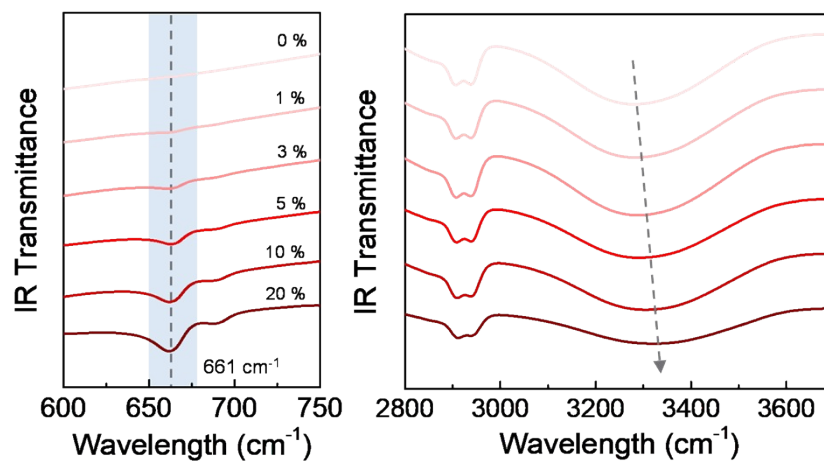

**Figure S1. Fourier transform infrared transmission spectra of the films.** Fourier transform infrared transmission spectra of PVA and cPVA films with different ratios of crosslinker (boric acid, 1%, 3%, 5%, 10% and 20%). The wavenumber bands centered at  $661\text{ cm}^{-1}$  and  $3300\text{ cm}^{-1}$  correspond B-O group and -OH group respectively.

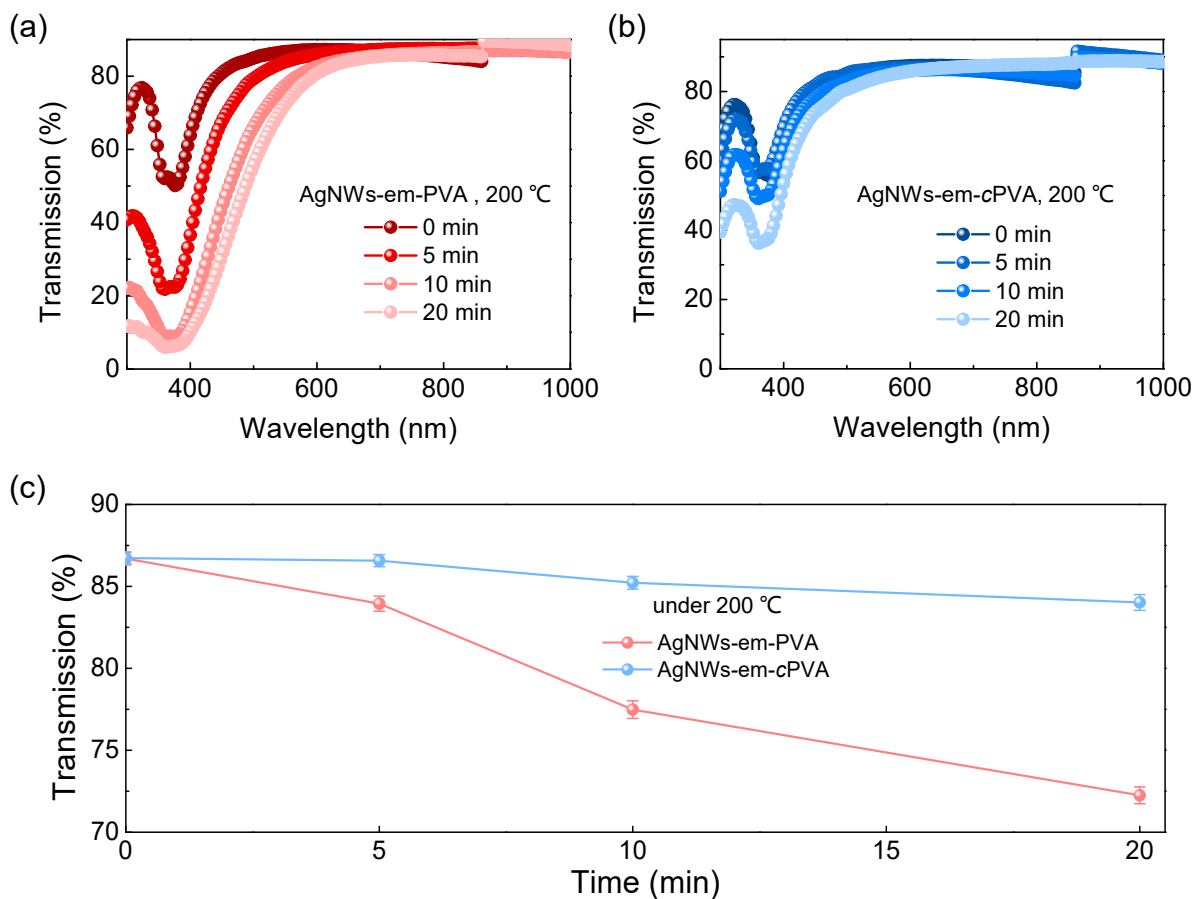

**Figure S2. The transmission of the electrodes after annealed at 200 °C for different times.** The transmission of the AgNWs-em-PVA (a) and AgNWs-em-cPVA (b) electrodes after annealed at 200 °C for 0 min, 5 min, 10 min and 20 min. (c) The transmission at 550 nm of AgNWs-em-PVA and AgNWs-em-cPVA electrodes after annealed at 200°C for different durations. Data are presented as mean values  $\pm$  standard deviation over 10 samples for each electrode. Curves drawn on top of data are guides to the eye.

(a)

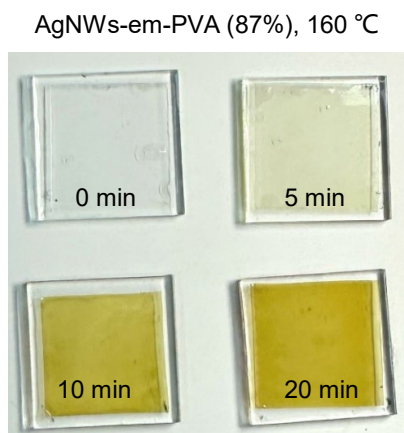

(b)

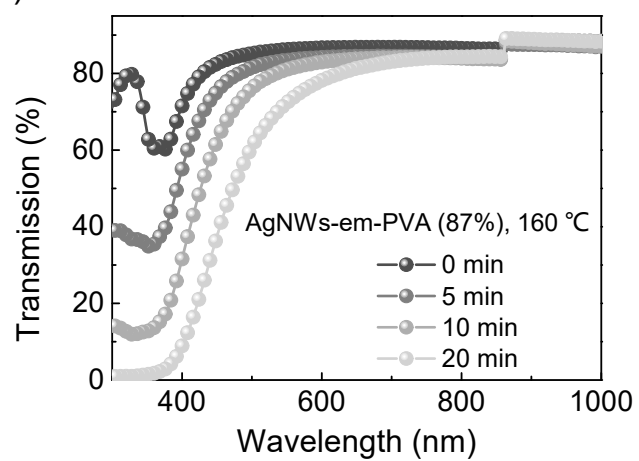

**Figure S3. The changes in color and transmittance of the electrodes after annealed at 160 °C for different times.** Photos of color changes (a) and transmittance (b) of the AgNWs-em-PVA (87%) electrodes after annealed at 160 °C for 0 min, 5 min, 10 min and 20 min. Curves drawn on top of data are guides to the eye.

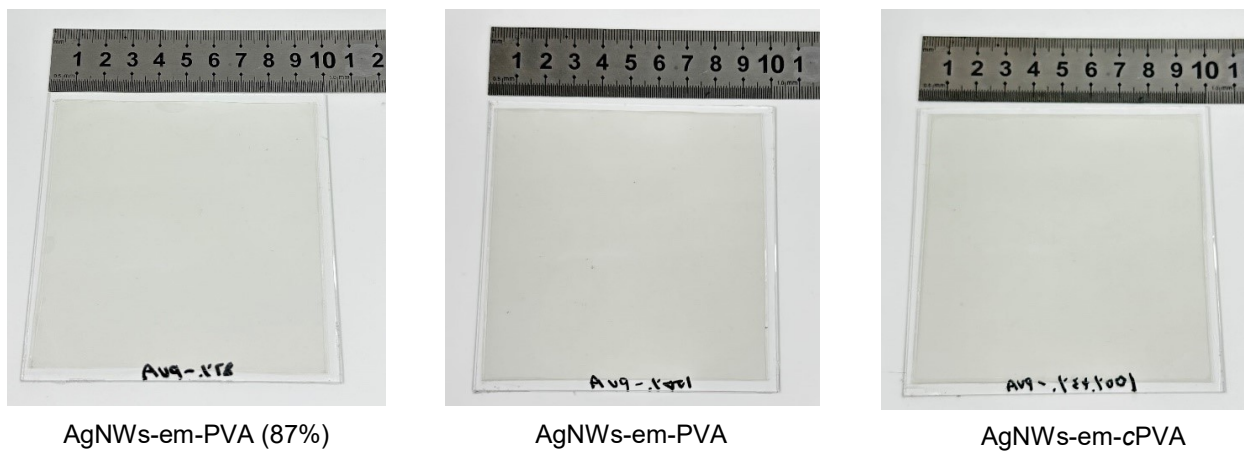

**Figure S4. The photos of the electrodes used for testing moisture adsorption rate.** The electrode of the AgNWs-em-PVA (87%), AgNWs-em-PVA and AgNWs-em-cPVA electrodes, with dimensions of 9.5 cm  $\times$  9.5 cm, were adhered to glass/PDMS substrates and exposed in an environment with a humidity of 60% and a temperature of 25 °C.

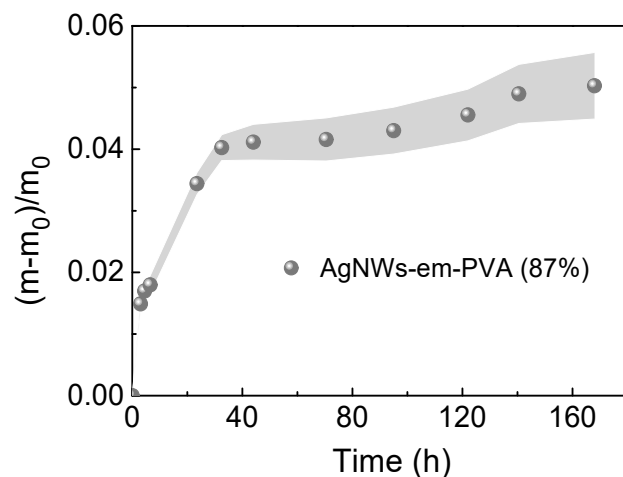

**Figure S5. The moisture adsorption rate of the electrodes.** The rate of change in the AgNWs-em-PVA (87%) electrode mass (calculated as the difference between real-time mass and initial mass, divided by the initial mass) varies with the duration of placement. Data are presented as mean values  $\pm$  standard deviation over 10 samples. Curves drawn on top of data are guides to the eye.

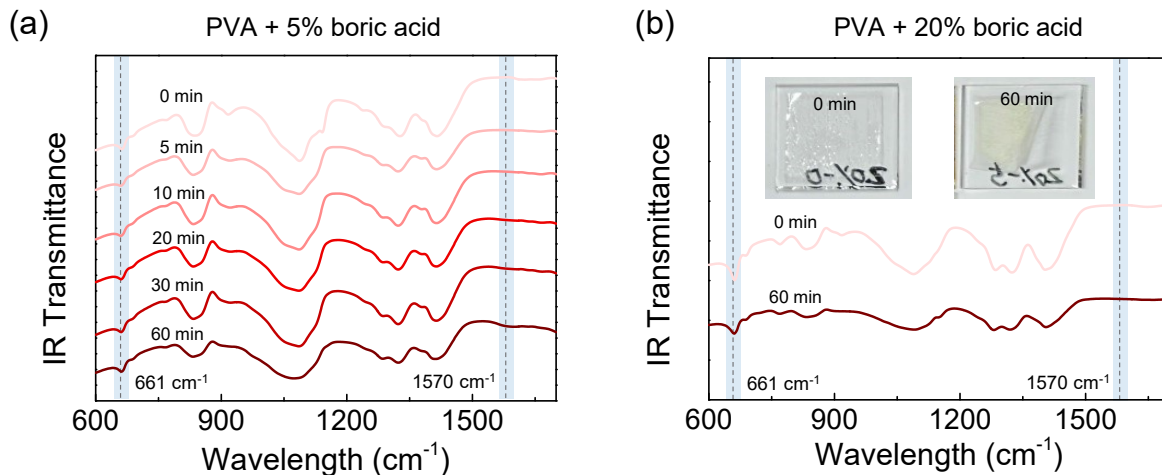

**Figure S6. Fourier transform infrared transmission spectrum of the cPVA.** Fourier transform infrared transmission spectrum of cPVA films with crosslinking degree of 5% (a) and 20% (b). The inset in (b) shows photographs of a 20% crosslinked PVA film before and after annealing at 200 °C for 60 minutes. Curves drawn on top of data are guides to the eye.

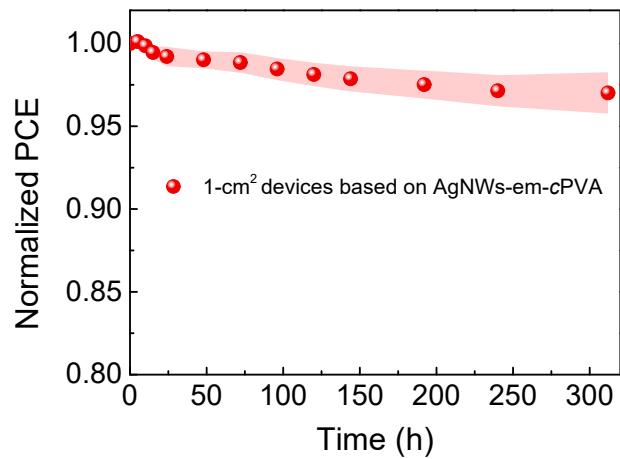

**Figure S7. Thermal stability of 1-cm<sup>2</sup> flexible devices based on AgNWs-em-cPVA electrodes at 80 °C in a N<sub>2</sub>-filled glovebox.** Data are presented as mean values  $\pm$  standard deviation over 10 samples. Curves drawn on top of data are guides to the eye.



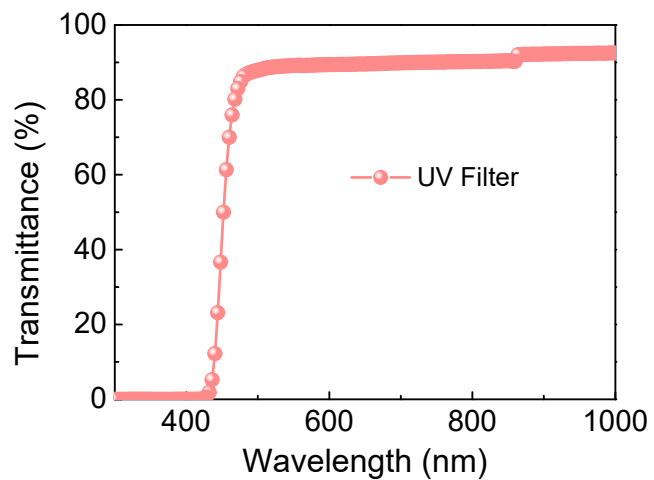

**Figure S8. The transmittance of the UV filter with the wavelength from 300 nm to 1,000 nm.** Curves drawn on top of data are guides to the eye.

**Table S1.** Photovoltaic parameters of flexible OSCs (active area: 1 cm<sup>2</sup>) based on the AgNWs-em-PVA and AgNWs-em-cPVA electrodes after being exposed in air with a R.H. of 60% and temperature of 25 °C for different time. The configuration of flexible OSCs is AgNWs-em-PVA or AgNWs-em-cPVA/PEI-Zn/PM6:BTP-eC9:PC<sub>71</sub>BM/MoO<sub>3</sub>/Ag.

| Substrate     | Placement time | $V_{oc}$ (V) | $J_{sc}$ (mA/cm <sup>2</sup> ) | FF   | PCE (%)                              |
|---------------|----------------|--------------|--------------------------------|------|--------------------------------------|
| AgNWs-em-PVA  | 0 h            | 0.84         | 25.27                          | 0.76 | 16.27<br>(16.11 ± 0.14) <sup>a</sup> |
|               | 24 h           | 0.84         | 25.19                          | 0.73 | 15.27<br>(15.18 ± 0.25) <sup>a</sup> |
|               | 96 h           | 0.83         | 25.13                          | 0.68 | 14.24<br>(14.08 ± 0.38) <sup>a</sup> |
|               | 168 h          | 0.83         | 25.09                          | 0.65 | 13.47<br>(13.41 ± 0.49) <sup>a</sup> |
| AgNWs-em-cPVA | 0 h            | 0.84         | 25.32                          | 0.77 | 16.38<br>(16.27 ± 0.13) <sup>a</sup> |
|               | 24 h           | 0.84         | 25.29                          | 0.76 | 16.14<br>(16.07 ± 0.15) <sup>a</sup> |
|               | 96 h           | 0.84         | 25.27                          | 0.76 | 16.11<br>(16.04 ± 0.18) <sup>a</sup> |
|               | 168 h          | 0.84         | 25.31                          | 0.75 | 15.92<br>(15.89 ± 0.19) <sup>a</sup> |

<sup>a</sup>Data are presented as mean values ± standard deviation from 15 devices.

**Table S2.** Photovoltaic parameters of flexible OSCs (active area: 1 cm<sup>2</sup>) based on the AgNWs-em-PVA or AgNWs-em-cPVA electrodes with the annealing temperature of the electron transport layer at 200 °C. The configuration of flexible OSCs is AgNWs-em-PVA/PEI-Zn/PM6:BTP-eC9:PC<sub>71</sub>BM/MoO<sub>3</sub>/Ag.

| Substrate     | $V_{oc}$ (V) | $J_{sc}$<br>(mA/cm <sup>2</sup> ) | FF   | PCE (%)                           |
|---------------|--------------|-----------------------------------|------|-----------------------------------|
| AgNWs-em-PVA  | 0.84         | 23.14                             | 0.72 | 14.07 (13.97 ± 0.11) <sup>a</sup> |
| AgNWs-em-cPVA | 0.84         | 25.26                             | 0.76 | 16.13 (16.08 ± 0.12) <sup>a</sup> |

<sup>a</sup>Data are presented as mean values ± standard deviation from 15 devices.

**Table S3.** Summary of the efficiency of flexible large-area modules prepared based on non-ITO electrodes.

| Year      | Device structure                                                                                                 | Area /<br>cm <sup>2</sup> | PCE / %             |
|-----------|------------------------------------------------------------------------------------------------------------------|---------------------------|---------------------|
| 2011      | PET/Cr/Al/Cr/P3HT:PCBM/PEDOT:PSS/Au-grid                                                                         | 13.2                      | 2.2 <sup>1</sup>    |
| 2012      | PET/Ag/ZnO/P3HT:PCBM/PEDOT:PSS/Ag                                                                                | 35.5                      | 0.44 <sup>2</sup>   |
| 2014      | Ag grid&HC<br>PEDOT:PSS/ZnO/MH301:PCBM/PFN/PEDOT:PSS(HTL)/ZnO/MH306:PCBM/PFN/PEDOT:PSS(HTL)/HC PEDOT:PSS&Ag grid | 52.2                      | 1.76 <sup>3</sup>   |
| 2015      | PET/Cr/Al/Cr/P3HT:PCBM/PEDOT:PSS/Ag Grid                                                                         | 32.55                     | 1.78 <sup>4</sup>   |
|           |                                                                                                                  | 6.10                      | 2.72 <sup>4</sup>   |
| 2019      | Embedded silver grid<br>substrate/PEDOT:PSS/ZnO/P3HT:PCBM/PEDOT:PSS/Ag                                           | 36                        | 1.84 <sup>5</sup>   |
| 2020      | PET/Ag-grid/PEDOT:PSS/ZnO/PTB7-<br>Th:COi8DFIC:PCBM/MoO <sub>3</sub> /Ag                                         | 25                        | 10.09 <sup>6</sup>  |
|           |                                                                                                                  | 50                        | 9.05 <sup>6</sup>   |
| 2022      | PET/Ag-grid/PEDOT:PSS/ZnO/PM6:Qx-1/MoO <sub>3</sub> /Ag                                                          | 30                        | 12.2 <sup>7</sup>   |
| 2023      | PET/Ag-grid/PEDOT:PSS/ZnO/AL/MoO <sub>3</sub> /Ag                                                                | 30                        | 13.08 <sup>8</sup>  |
| 2023      | PET/Ag/PEI-Zn/PM6:BTP-eC9/PEDOT:F/AgNWs-polymer                                                                  | 21                        | 12.3 <sup>9</sup>   |
| 2023      | PET/Ag-grid/PEDOT:PSS/ZnO/AL/MoO <sub>3</sub> /Ag                                                                | 46.2                      | 13.25 <sup>10</sup> |
| 2024      | AgNWs-em-PVA/PEI-Zn/PM6:BTP-eC9:PC <sub>71</sub> BM/MoO <sub>3</sub> /Ag                                         | 41                        | 14.04 <sup>11</sup> |
| this work | AgNWs-em-cPVA/PEI-Zn/PM6:BTP-eC9:PC <sub>71</sub> BM/MoO <sub>3</sub> /Ag                                        | 52.3                      | 14.78               |

## Reference

1. B. Zimmermann, H. F. Schleiermacher, M. Niggemann and U. Würfel, *Sol. Energy Mater. Sol. Cells*, 2011, **95**, 1587-1589.
2. D. Angmo, M. Hösel and F. C. Krebs, *Sol. Energy Mater. Sol. Cells*, 2012, **107**, 329-336.
3. T. R. Andersen, H. F. Dam, M. Hosel, M. Helgesen, J. E. Carle, T. T. Larsen-Olsen, S. A. Gevorgyan, J. W. Andreasen, J. Adams, N. Li, F. Machui, G. D. Spyropoulos, T. Ameri, N. Lemaitre, M. Legros, A. Scheel, D. Gaiser, K. Kreul, S. Berny, O. R. Lozman, S. Nordman, M. Valimaki, M. Vilkmann, R. R. Sondergaard, M. Jorgensen, C. J. Brabec and F. C. Krebs, *Energy Environ. Sci.*, 2014, **7**, 2925-2933.
4. D. Kaduwal, H.-F. Schleiermacher, J. Schulz-Gericke, S. Schiefer, Y. Liang Tan, J. Zhang, B. Zimmermann and U. Würfel, *Sol. Energy Mater. Sol. Cells*, 2015, **136**, 200-205.
5. S.-W. Kwak, S.-M. Yoon, S.-M. Yu, Y. Ju and D. Kim, *Sol. Energy Mater. Sol. Cells*, 2019, **193**, 169-177.
6. G. Wang, J. Zhang, C. Yang, Y. Wang, Y. Xing, M. A. Adil, Y. Yang, L. Tian, M. Su, W. Shang, K. Lu, Z. Shuai and Z. Wei, *Adv. Mater.*, 2020, **32**, 2005153.
7. Y.-F. Shen, H. Zhang, J. Zhang, C. Tian, Y. Shi, D. Qiu, Z. Zhang, K. Lu and Z. Wei, *Adv. Mater.*, 2023, **35**, 2209030.
8. C. Tian, J. Zhang, Y. Shen, H. Zhang, Z. Zhang, D. Qiu, L. Zhang and Z. Wei, *Sol. RRL*, 2023, **7**, 2300349.
9. C. Xie, Y. Liu, W. Wei and Y. Zhou, *Adv. Funct. Mater.*, 2023, **33**, 2210675.
10. C. X. Wang, X. M. Ma, Y. F. Shen, D. Deng, H. Zhang, T. Wang, J. Q. Zhang, J. Li, R. Wang, L. L. Zhang, Q. Cheng, Z. Q. Zhang, H. Q. Zhou, C. Y. Tian and Z. X. Wei, *Joule*, 2023, **7**, 2386-2401.
11. X. Lu, C. Xie, Y. Liu, H. Zheng, K. Feng, Z. Xiong, W. Wei and Y. Zhou, *Nat. Energy*, 2024, **9**, 793-802.
